# Supplementary material
Source: Springer Nature journal article supplement (https://www.springermedizin.de/resource/supplementary/12916_2008_175_MOESM1_ESM.pdf/9599326)

## Funding

## Conflicts of Interest

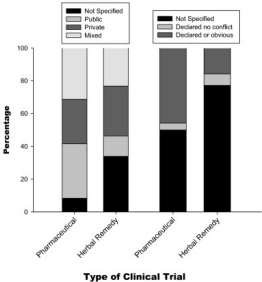

Supplement: MOESM1 [file 9599326]
